# Supplementary material
Source: ML conference proceedings conference paper supplement (https://openaccess.thecvf.com/content/ICCV2023/html/Kang_Noise-Aware_Learning_from_ICCV_2023_paper.html)
Supplement: Supplementary file 1 [file Kang_Noise-Aware_Learning_from_ICCV_2023_supplemental.pdf]

## Appendix

### A. Training Details for All Experiments

We provide detailed explanations for experimental settings of all our reported results in the main paper. We have conducted our experiments under two different settings: 1) *Learnable-Dense*, 2) *Frozen-CLS*. The main difference between the two configurations depends on the way of utilizing the visual encoder. Regarding the text decoder, we utilize the same decoder model, which consists of a 6-layer transformer network initialized randomly for both settings.

For the main experiments *i.e.*, Tabs. 1 to 3, we use the *Learnable-Dense* setting where the visual encoder, *i.e.*, pre-trained CLIP ViT-L/14, is tuned during the training phase and both the output [CLS] feature and other spatial features of the CLIP visual encoder are used as visual features. Since the length of output spatial visual features is very long ( $16 \times 16 = 256$ ), we apply 2d-average pooling to the spatial features with a scale factor of 1/4. As a result, the total length of the visual features becomes 17 ( $1 + 4 \times 4$ ). As optimization hyperparameters, we set learning rates to  $1e-5$  and  $1e-4$  for the visual encoder and the text decoder, respectively, with the same weight decay of  $1e-5$ .

On the other hand, we adopt the *Frozen-CLS* setting for all other analysis and ablation experiments due to its training efficiency. In the *Frozen-CLS* setting, the visual encoder, *i.e.* pre-trained CLIP ViT-L/14, is frozen and only the output [CLS] feature is used as the visual feature. In this setting, since the sequence length of the visual feature is 1, we use the visual feature as a prefix token of caption tokens like self-attention-based decoding in GIT [47]. We set the learning rate for the caption decoder to 0.0016.

For both settings, we train our model for 10 epochs. The learning rate is warmed up in the first epoch and then follows cosine decay to 0. Also, the network parameters are updated by AdamW [28] with  $\beta_1 = 0.9$  and  $\beta_2 = 0.999$ .

### B. Network Architecture Details

We present the network architecture of our alignment-level-controllable captioner in Fig. 10. When a pair of an image and a caption is given, we first calculate the cosine similarity,  $s \in \mathbb{R}$ , of the pair using pre-trained CLIP ViT-L/14. Then, we convert the similarity score into a discrete alignment level  $l \in \{1, \dots, K\}$  via the bucketing technique as described in Sec. 3.2. After getting the alignment level, we feed the discrete alignment level as a control signal into a learnable embedding layer to get a control vector that has the same dimension as the image embedding extracted from an image encoder. Finally, we concatenate the control signal and image embedding vectors and feed them to a caption decoder model. During the inference phase, we can simply set the control signal  $z$  as the desired alignment level (*e.g.*,

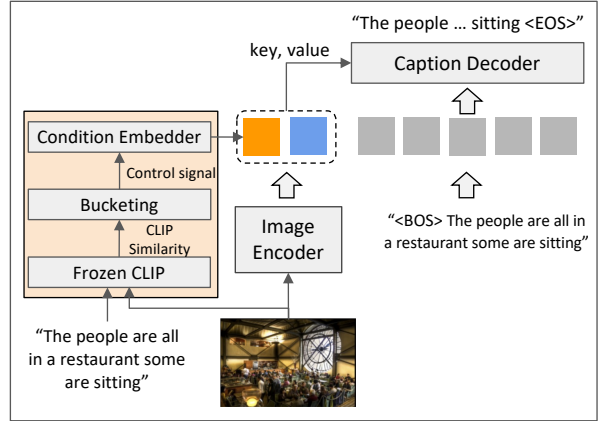

Figure 10: The network architecture of our alignment-level-controllable captioner. During the training phase, the calculated control signal is concatenated to the image embeddings. Then the concatenated vectors are fed into a cross-attention-based caption decoder model as key-value features.

Table 7: Zero-shot results on MSCOCO with different decoder architectures trained on CC3M dataset.

| Decoder          | Method        | B@4          | METEOR       | SPICE        | CIDEr        |
|------------------|---------------|--------------|--------------|--------------|--------------|
| GiT-like [47]    | Vanilla       | 8.65         | 14.40        | 10.32        | 40.24        |
|                  | Filtering     | 11.00        | 16.44        | 11.64        | 47.75        |
|                  | NoC ( $z=7$ ) | <b>12.70</b> | <b>18.05</b> | <b>12.95</b> | <b>51.11</b> |
| VirTex-like [12] | Vanilla       | 9.37         | 15.02        | 10.75        | 42.43        |
|                  | Filtering     | 11.24        | 16.89        | 12.37        | 50.43        |
|                  | NoC ( $z=7$ ) | <b>13.42</b> | <b>18.73</b> | <b>13.49</b> | <b>53.18</b> |

$z = 7$ ) to get a caption describing a given image.

### C. Backbone Agnostic Property

Our method requires only a minor modification (*i.e.*, adding a control signal) to a conventional image captioning model, which means that our proposed noise-aware learning framework can be easily applied to any captioning model. Despite we have mainly reported the results based on a VirTex-like [12] cross-attention-based transformer network in our main paper, our noise-aware learning framework also can be simply applied to a GIT-like [47] self-attention-based transformer network. For the VirTex-like architecture, the control signal is concatenated to visual features and fed into each cross-attention layer as key-value features like Fig. 10. While in the GIT-like architecture, we can simply use the concatenated features as prefix tokens of a caption.

To empirically validate the backbone agnostic property of our algorithm, we present additional comparative experiments in Tab. 7. In this experiment, we freeze the visual encoder and use both [CLS] token and other spatial features, referred to as *Frozen-Dense*, for training efficiency. From the Tab. 7, our proposed model consistently outperforms fairly-controlled comparative baselines by large margins on both decoder architectures.

| Models              | MSCOCO       |              |              |              | nocaps       |              |              |              |              |              |               |              |
|---------------------|--------------|--------------|--------------|--------------|--------------|--------------|--------------|--------------|--------------|--------------|---------------|--------------|
|                     | B@4          | M            | C            | CS           | overall      |              | in-domain    |              | near-domain  |              | out-of-domain |              |
|                     |              |              |              |              | C            | CS           | C            | CS           | C            | CS           | C             | CS           |
| Vanilla             | 10.31        | 15.48        | 47.56        | 62.89        | 41.58        | 60.49        | 38.60        | 58.64        | 39.24        | 59.91        | 51.22         | 62.15        |
| Vanilla (Filtering) | 12.81        | 17.30        | 54.66        | 64.84        | 48.96        | 62.70        | 46.06        | 60.74        | 46.33        | 62.35        | 59.50         | 63.92        |
| Bootstrap           | 13.51        | 17.46        | 55.13        | 64.31        | 49.46        | 62.16        | 45.23        | 60.60        | 47.14        | 61.62        | 59.93         | 63.62        |
| NoC ( $z=7$ )       | <b>15.96</b> | <b>19.50</b> | <b>62.04</b> | <b>66.70</b> | <b>54.94</b> | <b>64.21</b> | <b>51.74</b> | <b>62.54</b> | <b>53.09</b> | <b>63.92</b> | <b>63.15</b>  | <b>65.19</b> |

Table 8: Comparison with the Bootstrap baseline. All models are trained on CC3M and evaluated on MSCOCO and nocaps datasets. B@4, M, C, and CS mean BLEU@4, METEOR, CIDEr, and CLIPScore metrics, respectively. Numbers in **bold** indicate the best method.

## D. Details for Loss Weighting Baseline

We have defined the Loss weighting baseline in Sec. 4.2 as follows:

$$\mathcal{L}_{\text{weighting}} = -\frac{1}{N} \sum_{i=1}^N s_i \log p(c_i | I_i), \quad (5)$$

where  $s_i$  indicates a cosine similarity computed by CLIP for  $i^{\text{th}}$  image-text pair in a minibatch of  $N$  instances.

Additionally, since the range of cosine similarity from training samples is approximately ranged between 0 and 0.5 as shown in Fig. 11, we apply min-max normalization to  $s$  and multiply by 2 for equalizing the averaged loss scale. This loss reweighting strategy makes the model be updated by less for miss-aligned samples and more on well-aligned ones.

For a better understanding, we visualize the distribution of cosine similarities of the CC3M training split in Fig. 11. The range of raw cosine similarities is distributed from -0.037 to 0.482, and the mean of the distribution is 0.239. If we use the cosine similarities directly for loss re-weighting defined in Eq. (5), the scale of the overall loss value becomes low, which could result in slow convergence of the training phase. Thus, to equalize the averaged loss scale, we re-scale the cosine similarities for the loss re-weighting strategy by applying min-max normalization and multiplying by 2. Statistics of the resulting distribution of the re-scaled cosine similarities are 0.0, 2.0, and 1.066 for minimum, maximum, and mean values, respectively.

## E. Comparison with Data Bootstrapping

While BLIP [24] and our method have a similar motivation, *i.e.*, handle the noise issue inherent in the web-crawled dataset, we remark that BLIP requires clean data (*e.g.*, MSCOCO) to learn a filter and captioner for bootstrapping as we discussed in Sec. 2. Despite the necessity of clean data in BLIP, we carefully devised an additional experiment to evaluate the effectiveness of the data bootstrapping technique introduced in BLIP for our zero-shot experimental setting.

Firstly, as the captioner and filter models of BLIP are fine-tuned using the clean MSCOCO dataset, we implement

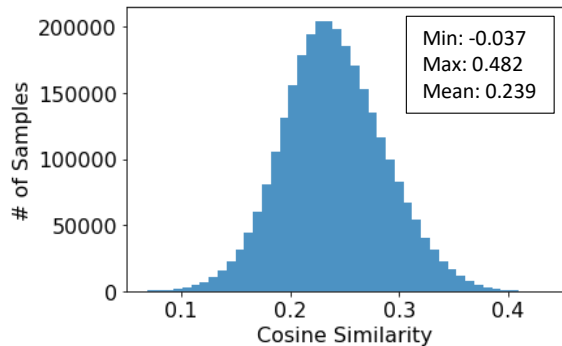

(a) Distribution of cosine similarities *before* re-scaling.

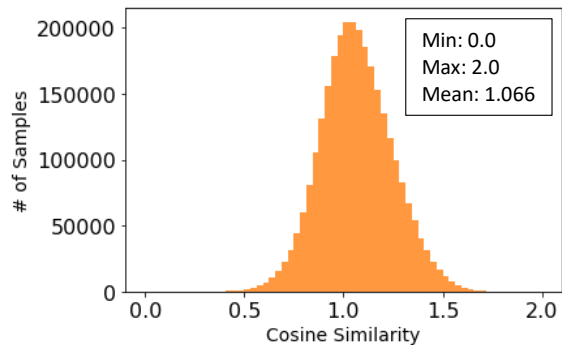

(b) Distribution of cosine similarities *after* re-scaling.

Figure 11: Distributions of cosine similarities for all image-text pairs in the CC3M training split. The cosine similarity is calculated by pre-trained CLIP ViT-L/14. Statistics for each distribution are presented in the upper right region in each figure.

a replacement for the purpose of zero-shot evaluation on MSCOCO. Specifically, we employ our Vanilla (Filtering) model, which has been trained on the filtered CC3M dataset, to replace the captioner, and we utilize the pre-trained CLIP ViT-B/32 as a substitute for the filter. Subsequently, we partitioned the original CC3M dataset into two groups. The first group consists of image-text pairs with a CLIP similarity greater than 0.3, which are considered well-aligned annotations. While the second group comprises image-text pairs with a CLIP similarity lower than 0.3, which are

| Models              | MSCOCO       |              |              |              | nocaps       |              |              |              |              |              |               |              |
|---------------------|--------------|--------------|--------------|--------------|--------------|--------------|--------------|--------------|--------------|--------------|---------------|--------------|
|                     | B@4          | M            | C            | CS           | overall      |              | in-domain    |              | near-domain  |              | out-of-domain |              |
|                     |              |              |              |              | C            | CS           | C            | CS           | C            | CS           | C             | CS           |
| Vanilla             | 10.31        | 15.48        | 47.56        | 62.89        | 41.58        | 60.49        | 38.60        | 58.64        | 39.24        | 59.91        | 51.22         | 62.15        |
| Vanilla (Filtering) | 12.81        | 17.30        | 54.66        | 64.84        | 48.96        | 62.70        | 46.06        | 60.74        | 46.33        | 62.35        | 59.50         | 63.92        |
| Loss weighting      | 11.16        | 16.15        | 50.86        | 63.87        | 43.89        | 61.18        | 39.30        | 59.23        | 41.80        | 60.50        | 53.84         | 63.04        |
| NoC (z=1)           | 12.65        | 16.44        | 52.78        | 63.23        | 43.95        | 60.55        | 41.39        | 58.50        | 42.11        | 60.30        | 51.70         | 61.62        |
| NoC (z=2)           | 3.77         | 8.21         | 12.83        | 45.24        | 10.26        | 43.43        | 11.96        | 46.29        | 10.76        | 44.46        | 7.45          | 40.60        |
| NoC (z=3)           | 3.70         | 9.19         | 17.33        | 49.67        | 15.12        | 48.05        | 16.45        | 49.56        | 15.68        | 48.66        | 12.40         | 46.48        |
| NoC (z=4)           | 8.19         | 13.52        | 39.61        | 59.86        | 32.25        | 57.23        | 30.04        | 56.01        | 31.76        | 57.23        | 35.39         | 57.62        |
| NoC (z=5)           | 11.88        | 16.28        | 52.11        | 64.01        | 45.68        | 61.72        | 41.25        | 59.57        | 43.74        | 61.18        | 55.05         | 63.23        |
| NoC (z=6)           | <u>14.38</u> | <u>18.27</u> | <u>58.76</u> | <u>65.82</u> | <u>51.50</u> | <u>63.52</u> | <u>48.02</u> | <u>61.82</u> | <u>49.60</u> | <u>63.13</u> | <u>60.06</u>  | 63.52        |
| NoC (z=7)           | <b>15.96</b> | <b>19.50</b> | <b>62.04</b> | <b>66.70</b> | <b>54.94</b> | <b>64.21</b> | <b>51.74</b> | <b>62.54</b> | <b>53.09</b> | <b>63.92</b> | <b>63.15</b>  | <b>65.19</b> |
| NoC (z=8)           | 12.82        | 17.46        | 53.50        | 64.94        | 48.05        | 62.64        | 42.44        | 60.16        | 45.86        | 62.20        | 59.08         | <u>64.21</u> |

Table 9: Zero-shot captioning results for all bin indices from models trained on CC3M. Numbers in **bold** and underlined indicate the best and second-best ones, respectively.

considered less-aligned annotations. After separating the dataset, we use the trained Vanilla (Filtering) model to generate pseudo-captions for the images in the second group, as suggested by BLIP. Finally, we train a Vanilla model with the bootstrapped dataset under the *Learnable-Dense* setting.

From the Tab. 8, we observed that the Bootstrap baseline shows marginally higher captioning scores than the Vanilla (Filtering). In contrast, the Bootstrap baseline shows significantly lower scores than our proposed model. We carefully hypothesize that the bootstrapping technique would yield optimal results when a clean dataset of the target domain is available for training the captioner and filter. On the other hand, our proposed model can effectively mitigate the negative impact of noisy pairs utilizing only the web-crawled data. Consequently, it shows superior zero-shot generalization performance in comparison to the data bootstrapping technique.

## F. Detailed Results for All Alignment Levels

We provide comprehensive results for zero-shot captioning and self-retrieval tasks originally reported in Tabs. 1 and 3, with the aim of using these expended results to help verify that our noise-aware model is trained according to our intentions. Tabs. 9 and 11 present zero-shot captioning results. Each model is trained on either CC3M or various scales of COYO and evaluated on MSCOCO and nocaps datasets. From the tables, our model consistently outperforms other baselines when ( $z \geq 6$ ). On the other hand, when ( $z < 6$ ), our model shows lower scores than the comparative baselines. This trend is reasonable considering that image-text pairs with bin indices of  $z < 6$  are relatively less-aligned pairs. Consequently, our model, when conditioned on these indices, is expected to generate less-aligned captions.

From the Tabs. 10 and 12, we observe a similar trend in

| Models              | MSCOCO       |              |              | Flickr30k    |              |              |
|---------------------|--------------|--------------|--------------|--------------|--------------|--------------|
|                     | R@1          | R@5          | R@10         | R@1          | R@5          | R@10         |
| GT Caption          | 34.57        | 59.30        | 69.91        | 63.08        | 86.50        | 92.00        |
| Vanilla             | 25.44        | 50.38        | 61.66        | 47.10        | 76.60        | 85.90        |
| Vanilla (Filtering) | 31.64        | 58.90        | 70.36        | 56.50        | 85.50        | 92.50        |
| Loss weighting      | 28.78        | 54.44        | 65.44        | 48.00        | 78.90        | 87.50        |
| NoC (z=1)           | 25.92        | 49.92        | 61.98        | 44.60        | 77.20        | 86.60        |
| NoC (z=2)           | 2.44         | 7.86         | 11.46        | 8.30         | 21.50        | 29.20        |
| NoC (z=3)           | 5.02         | 13.12        | 18.98        | 12.70        | 30.90        | 40.00        |
| NoC (z=4)           | 17.34        | 38.86        | 50.30        | 32.30        | 66.70        | 75.30        |
| NoC (z=5)           | 29.02        | 54.32        | 66.26        | 50.30        | 84.10        | 91.10        |
| NoC (z=6)           | <u>35.26</u> | <u>62.78</u> | <u>73.88</u> | <u>60.00</u> | <u>89.90</u> | <u>95.40</u> |
| NoC (z=7)           | <b>40.00</b> | <b>66.78</b> | <b>77.53</b> | <b>65.10</b> | <b>92.00</b> | <b>96.20</b> |
| NoC (z=8)           | 32.30        | 57.60        | 69.72        | 54.90        | 85.80        | 93.50        |

Table 10: Self-retrieval capability for all bin indices on MSCOCO and Flickr30k datasets. Numbers in **bold** and underlined indicate the best and second-best ones, respectively.

retrieval performance as in captioning results, *i.e.*, increasing the bin index leads to higher scores. Notably, as illustrated in Tab. 12, self-retrieval performance consistently improves as models are trained on larger-scale datasets. This suggests that a model can generate more distinctive captions as it learns a broader range of visual concepts from larger datasets.

We note that a model trained in CC3M shows irregular performance at the lowest bin index ( $z = 1$ ). We hypothesize that this is due to the extremely small number of samples for  $z = 1$  in CC3M (only 21 samples included), which prevents the model from being fully trained for the noisiest samples. In contrast, for COYO, which is much noisier than CC3M, the number of noisiest samples is sufficiently large, resulting in the model showing the worst performance at  $z = 1$ .

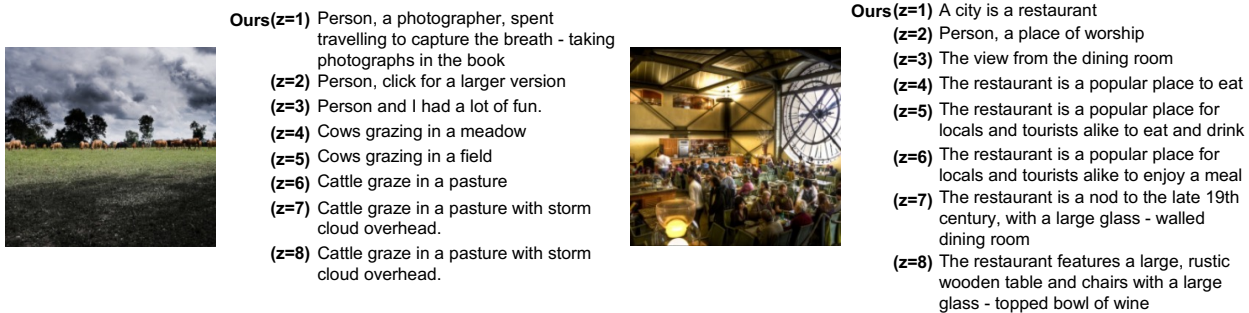

Figure 12: Examples of generated captions from all alignment levels of our model.

## G. Discussion on Similarity Computation Module

We examine how robust our model is to the variations on the alignment level computation module used for computing cosine similarities between given image-text pairs. We change the alignment level computation module from pre-trained CLIP ViT-L/14 to CLIP ViT-B/32 which has fewer parameters resulting in faster computations of alignment levels but shows lower performance than the ViT-L/14-based model in other downstream tasks [38]. The zero-shot captioning and self-retrieval results are presented in Tab. 13 and Tab. 14, respectively. From the tables, we observe that our model shows almost consistent performance on both the captioning and retrieval tasks, even if the alignment level computation module is changed to a model having relatively lower representation power. Also, we expect that if we can use a more powerful model trained to capture fine-grained alignments between images and paired texts, such as Florence [55] or FILIP [53]<sup>3</sup>, for measuring the alignment levels, our proposed noise-aware learning framework can perform better than current results as the powerful alignment computation module measures the alignment level more accurately.

## H. More Qualitative Results

### H.1. Zero-shot Captioning Results

We present the captioning results for all alignment levels of our model to show that our model can effectively control the quality of generated captions in Fig. 12. From the Fig. 12, our quality controllable model generates miss aligned or less descriptive captions with the control signals corresponding to low alignment levels (*i.e.*,  $z \leq 3$ ). While, with the control signals meaning to middle alignment levels (*i.e.*,  $4 \leq z \leq 6$ ), our model describes the images using common words as other baselines do. Finally, our model with the control signals corresponding to high alignment

levels (*i.e.*,  $z \geq 7$ ) can generate captions satisfying both *descriptiveness* and *distinctiveness*.

In addition, we provide more zero-shot captioning examples in Fig. 13. As discussed in Sec. 4.7, baseline models tend to describe given images using common words (or phrases), while our model with a higher alignment level (*e.g.*,  $z = 7$ ) describes the images with more various words (or phrases) based on learned rich visual knowledge.

### H.2. Self-retrieval Results

We present more examples of self-retrieval results on the MSCOCO dataset for Vanilla (Filtering) baseline and our method in Fig. 14.

<sup>3</sup>Checkpoints of the models have not been released publicly yet.

| Models              | MSCOCO      |              |              |              | nocaps       |              |              |              |              |              |               |              |
|---------------------|-------------|--------------|--------------|--------------|--------------|--------------|--------------|--------------|--------------|--------------|---------------|--------------|
|                     | B@4         | M            | C            | CS           | overall      |              | in-domain    |              | near-domain  |              | out-of-domain |              |
|                     |             |              |              |              | C            | CS           | C            | CS           | C            | CS           | C             | CS           |
| Vanilla             | 4.41        | 10.49        | 22.54        | 58.25        | 21.30        | 57.62        | 17.76        | 55.97        | 18.98        | 56.74        | 31.26         | 59.79        |
| Vanilla (Filtering) | 4.65        | 11.52        | 22.48        | 59.67        | 21.29        | 59.04        | 18.15        | 56.22        | 19.25        | 58.68        | 30.07         | 60.56        |
| NoC (z=1)           | 0.00        | 2.40         | 0.09         | 30.86        | 0.08         | 30.85        | 0.05         | 30.72        | 0.09         | 30.29        | 0.07          | 31.95        |
| NoC (z=2)           | 0.00        | 2.38         | 0.13         | 31.20        | 0.15         | 31.36        | 0.24         | 30.17        | 0.15         | 30.89        | 0.10          | 32.60        |
| NoC (z=3)           | 0.31        | 4.28         | 3.15         | 41.82        | 2.31         | 40.49        | 2.74         | 40.33        | 2.32         | 40.52        | 1.97          | 40.47        |
| NoC (z=4)           | 2.40        | 8.30         | 16.21        | 54.88        | 17.05        | 54.33        | 13.20        | 52.25        | 15.45        | 53.53        | 24.93         | 56.44        |
| NoC (z=5)           | 5.40        | 11.37        | 25.80        | 60.35        | 24.21        | 59.36        | 20.17        | 56.96        | 21.84        | 58.81        | 34.70         | 61.10        |
| NoC (z=6)           | <b>6.60</b> | 13.39        | <b>28.90</b> | 62.50        | <u>26.92</u> | 61.22        | <b>23.19</b> | 58.33        | <u>24.84</u> | 61.00        | <u>36.24</u>  | 62.48        |
| NoC (z=7)           | <u>6.59</u> | <u>14.19</u> | <u>28.10</u> | <b>63.33</b> | <b>27.24</b> | <b>62.09</b> | <u>22.17</u> | <b>59.32</b> | <b>25.29</b> | <b>61.86</b> | <b>37.09</b>  | <b>63.34</b> |
| NoC (z=8)           | 6.06        | <b>14.39</b> | 24.72        | <u>63.13</u> | 24.85        | <u>61.88</u> | 19.57        | <u>58.67</u> | 23.14        | <u>61.63</u> | 34.11         | <u>63.31</u> |

(a) Zero-shot captioning results from models trained on COYO3M

| Models              | MSCOCO      |              |              |              | nocaps       |              |              |              |              |              |               |              |
|---------------------|-------------|--------------|--------------|--------------|--------------|--------------|--------------|--------------|--------------|--------------|---------------|--------------|
|                     | B@4         | M            | C            | CS           | overall      |              | in-domain    |              | near-domain  |              | out-of-domain |              |
|                     |             |              |              |              | C            | CS           | C            | CS           | C            | CS           | C             | CS           |
| Vanilla             | 5.34        | 11.31        | 27.52        | 60.69        | 24.00        | 59.61        | 18.32        | 56.52        | 21.95        | 58.96        | 34.59         | 61.77        |
| Vanilla (Filtering) | 6.51        | 12.71        | 29.25        | 64.11        | 26.88        | 62.83        | 21.39        | 60.87        | 24.84        | 62.52        | 37.30         | 63.98        |
| NoC (z=1)           | 0.10        | 2.37         | 0.13         | 28.44        | 0.12         | 27.39        | 0.17         | 26.64        | 0.11         | 27.17        | 0.11          | 28.03        |
| NoC (z=2)           | 0.00        | 2.44         | 0.28         | 32.28        | 0.23         | 31.75        | 0.29         | 30.62        | 0.26         | 31.63        | 0.12          | 32.30        |
| NoC (z=3)           | 0.52        | 4.33         | 3.56         | 41.89        | 2.46         | 40.45        | 2.85         | 40.32        | 2.49         | 40.39        | 2.08          | 40.60        |
| NoC (z=4)           | 2.90        | 8.94         | 19.62        | 56.20        | 18.78        | 55.61        | 15.70        | 52.46        | 16.80        | 54.92        | 27.33         | 57.84        |
| NoC (z=5)           | 6.22        | 12.09        | 29.86        | 62.60        | 27.27        | 61.44        | 21.82        | 58.53        | 25.45        | 61.04        | 36.97         | 63.08        |
| NoC (z=6)           | <b>7.32</b> | 14.05        | <b>32.63</b> | 65.33        | <u>30.57</u> | 63.91        | <u>25.33</u> | 60.63        | <b>28.28</b> | 63.77        | 41.65         | 65.12        |
| NoC (z=7)           | <u>7.05</u> | <u>15.03</u> | <u>30.59</u> | <u>66.26</u> | <b>30.66</b> | <u>65.08</u> | <b>26.11</b> | <u>61.95</u> | <u>27.91</u> | <u>64.94</u> | <b>42.72</b>  | <u>66.27</u> |
| NoC (z=8)           | 6.92        | <b>15.59</b> | 27.75        | <b>66.65</b> | 29.07        | <b>65.35</b> | 24.75        | <b>63.06</b> | 26.02        | <b>65.20</b> | <u>41.93</u>  | <b>66.32</b> |

(b) Zero-shot captioning results from models trained on COYO10M

| Models              | MSCOCO      |              |              |              | nocaps       |              |              |              |              |              |               |              |
|---------------------|-------------|--------------|--------------|--------------|--------------|--------------|--------------|--------------|--------------|--------------|---------------|--------------|
|                     | B@4         | M            | C            | CS           | overall      |              | in-domain    |              | near-domain  |              | out-of-domain |              |
|                     |             |              |              |              | C            | CS           | C            | CS           | C            | CS           | C             | CS           |
| Vanilla             | 5.17        | 11.32        | 27.07        | 62.06        | 25.32        | 60.93        | 19.29        | 58.43        | 23.05        | 60.26        | 36.87         | 62.95        |
| Vanilla (Filtering) | 7.18        | 13.33        | <u>32.52</u> | 65.87        | 29.85        | 64.65        | <u>25.33</u> | 62.48        | 27.64        | 64.25        | 40.18         | 66.05        |
| NoC (z=1)           | 0.00        | 2.96         | 0.08         | 33.45        | 0.08         | 31.54        | 0.11         | 30.90        | 0.08         | 31.34        | 0.07          | 32.12        |
| NoC (z=2)           | 0.00        | 3.14         | 0.18         | 35.89        | 0.18         | 34.65        | 0.26         | 33.81        | 0.19         | 34.39        | 0.08          | 35.38        |
| NoC (z=3)           | 0.36        | 4.33         | 2.57         | 41.26        | 1.68         | 39.40        | 1.88         | 39.34        | 1.78         | 39.70        | 1.20          | 38.86        |
| NoC (z=4)           | 2.81        | 9.03         | 19.97        | 56.93        | 18.84        | 56.11        | 14.33        | 53.29        | 17.19        | 55.30        | 27.34         | 58.46        |
| NoC (z=5)           | 6.11        | 12.05        | 30.25        | 63.67        | 27.29        | 62.53        | 22.40        | 59.81        | 25.11        | 62.06        | 37.75         | 64.21        |
| NoC (z=6)           | <b>7.59</b> | 14.19        | <b>33.43</b> | 66.65        | <b>30.60</b> | 65.17        | <b>26.59</b> | 62.64        | <u>28.11</u> | 65.00        | <b>41.45</b>  | 66.24        |
| NoC (z=7)           | <u>7.57</u> | <u>15.54</u> | 31.72        | <u>68.12</u> | <u>30.55</u> | <u>66.59</u> | 25.25        | <u>64.00</u> | <b>28.52</b> | <u>66.46</u> | <u>40.85</u>  | <u>67.60</u> |
| NoC (z=8)           | 7.01        | <b>16.37</b> | 25.45        | <b>68.80</b> | 27.11        | <b>67.39</b> | 21.02        | <b>64.92</b> | 24.34        | <b>67.26</b> | 40.33         | <b>68.36</b> |

(c) Zero-shot captioning results from models trained on COYO23M

| Models              | MSCOCO      |              |              |              | nocaps       |              |              |              |              |              |               |              |
|---------------------|-------------|--------------|--------------|--------------|--------------|--------------|--------------|--------------|--------------|--------------|---------------|--------------|
|                     | B@4         | M            | C            | CS           | overall      |              | in-domain    |              | near-domain  |              | out-of-domain |              |
|                     |             |              |              |              | C            | CS           | C            | CS           | C            | CS           | C             | CS           |
| Vanilla             | 4.92        | 11.18        | 28.03        | 62.40        | 25.29        | 61.73        | 20.25        | 59.14        | 22.56        | 60.98        | 37.63         | 63.90        |
| Vanilla (Filtering) | 7.80        | 13.48        | <u>34.55</u> | 66.75        | 30.93        | 65.56        | <u>26.90</u> | 63.47        | 28.75        | 65.35        | 40.77         | 66.58        |
| NoC (z=1)           | 0.00        | 2.04         | 0.09         | 33.84        | 0.09         | 31.25        | 0.16         | 30.30        | 0.08         | 30.71        | 0.10          | 32.56        |
| NoC (z=2)           | 0.00        | 2.04         | 0.20         | 35.42        | 0.18         | 33.37        | 0.38         | 32.51        | 0.15         | 32.94        | 0.17          | 34.44        |
| NoC (z=3)           | 0.45        | 4.38         | 2.98         | 40.84        | 1.96         | 38.61        | 2.00         | 38.88        | 2.15         | 39.09        | 1.30          | 37.62        |
| NoC (z=4)           | 3.11        | 9.18         | 21.26        | 57.13        | 19.15        | 56.31        | 15.32        | 53.77        | 17.37        | 55.53        | 27.59         | 58.54        |
| NoC (z=5)           | 6.68        | 12.37        | 31.54        | 64.60        | 27.62        | 63.35        | 22.70        | 60.74        | 25.68        | 62.98        | 37.34         | 64.82        |
| NoC (z=6)           | <b>8.44</b> | 14.53        | <b>35.82</b> | 67.72        | <b>31.62</b> | 66.32        | <b>27.12</b> | 64.30        | <u>28.98</u> | 66.18        | <u>43.33</u>  | 67.19        |
| NoC (z=7)           | <u>8.08</u> | <u>15.87</u> | 32.86        | 69.24        | <u>31.55</u> | <u>67.74</u> | 24.05        | <u>65.75</u> | <b>29.05</b> | <u>67.66</u> | <b>44.95</b>  | <u>68.46</u> |
| NoC (z=8)           | 7.12        | <b>16.73</b> | 23.85        | <b>69.87</b> | 25.35        | <b>68.51</b> | 18.08        | <b>66.73</b> | 22.44        | <b>68.41</b> | 39.85         | <b>69.24</b> |

(d) Zero-shot captioning results from models trained on COYO125M

Table 11: Zero-shot caption generation performance on MSCOCO and nocaps when scaling up the training dataset sizes using COYO. Models of each dataset are trained for the same number of steps. Numbers in **bold** and underlined indicate the best and second-best ones, respectively.

| Models              | MSCOCO       |              |              | Flickr30k    |              |              |
|---------------------|--------------|--------------|--------------|--------------|--------------|--------------|
|                     | R@1          | R@5          | R@10         | R@1          | R@5          | R@10         |
| GT Caption          | 34.57        | 59.30        | 69.91        | 63.08        | 86.50        | 92.00        |
| Vanilla             | 24.92        | 48.96        | 59.90        | 47.90        | 73.90        | 82.10        |
| Vanilla (Filtering) | 31.78        | 57.96        | 69.08        | 52.20        | 82.00        | 90.80        |
| NoC (z=1)           | 0.08         | 0.24         | 0.44         | 0.20         | 1.10         | 1.90         |
| NoC (z=2)           | 0.08         | 0.32         | 0.78         | 0.10         | 0.90         | 1.70         |
| NoC (z=3)           | 1.32         | 4.20         | 6.50         | 3.10         | 10.10        | 15.00        |
| NoC (z=4)           | 14.16        | 34.10        | 44.30        | 28.40        | 54.90        | 66.60        |
| NoC (z=5)           | 30.16        | 57.14        | 67.86        | 54.30        | 81.10        | 88.90        |
| NoC (z=6)           | 39.28        | 68.30        | 77.86        | 62.80        | 88.30        | 92.90        |
| NoC (z=7)           | <u>44.96</u> | <u>72.56</u> | <u>81.42</u> | <u>66.50</u> | <u>89.40</u> | <u>94.70</u> |
| NoC (z=8)           | <b>45.76</b> | <b>73.02</b> | <b>81.90</b> | <b>69.70</b> | <b>91.00</b> | <b>94.80</b> |

(a) Self-retrieval results from models trained on COYO3M

| Models              | MSCOCO       |              |              | Flickr30k    |              |              |
|---------------------|--------------|--------------|--------------|--------------|--------------|--------------|
|                     | R@1          | R@5          | R@10         | R@1          | R@5          | R@10         |
| GT Caption          | 34.57        | 59.30        | 69.91        | 63.08        | 86.50        | 92.00        |
| Vanilla             | 34.70        | 60.42        | 71.02        | 58.70        | 83.20        | 88.30        |
| Vanilla (Filtering) | 48.70        | 75.62        | 84.28        | 74.10        | 93.30        | 96.30        |
| NoC (z=1)           | 0.02         | 0.18         | 0.30         | 0.00         | 0.70         | 0.90         |
| NoC (z=2)           | 0.06         | 0.34         | 0.68         | 0.40         | 1.20         | 1.90         |
| NoC (z=3)           | 1.30         | 3.82         | 6.42         | 2.90         | 8.20         | 13.90        |
| NoC (z=4)           | 17.44        | 38.68        | 50.14        | 33.50        | 61.00        | 72.00        |
| NoC (z=5)           | 39.04        | 66.58        | 77.42        | 65.90        | 89.50        | 94.60        |
| NoC (z=6)           | 52.80        | 79.42        | 87.62        | 76.60        | 93.50        | 96.90        |
| NoC (z=7)           | <u>61.40</u> | <u>85.32</u> | <u>91.38</u> | <u>81.30</u> | <u>96.60</u> | <u>98.00</u> |
| NoC (z=8)           | <b>64.92</b> | <b>86.46</b> | <b>92.60</b> | <b>84.10</b> | <b>96.80</b> | <b>98.40</b> |

(c) Self-retrieval results from models trained on COYO23M

| Models              | MSCOCO       |              |              | Flickr30k    |              |              |
|---------------------|--------------|--------------|--------------|--------------|--------------|--------------|
|                     | R@1          | R@5          | R@10         | R@1          | R@5          | R@10         |
| GT Caption          | 34.57        | 59.30        | 69.91        | 63.08        | 86.50        | 92.00        |
| Vanilla             | 31.44        | 55.48        | 66.42        | 56.30        | 79.90        | 86.20        |
| Vanilla (Filtering) | 43.56        | 70.60        | 80.42        | 67.80        | 90.30        | 95.00        |
| NoC (z=1)           | 0.06         | 0.22         | 0.44         | 0.20         | 1.00         | 1.80         |
| NoC (z=2)           | 0.18         | 0.44         | 0.94         | 0.40         | 1.40         | 2.20         |
| NoC (z=3)           | 1.48         | 4.72         | 7.08         | 3.10         | 9.70         | 14.90        |
| NoC (z=4)           | 16.24        | 36.94        | 48.14        | 33.80        | 60.40        | 71.70        |
| NoC (z=5)           | 35.98        | 63.52        | 75.08        | 59.70        | 86.60        | 92.70        |
| NoC (z=6)           | 48.24        | 76.44        | 84.82        | 71.20        | 92.60        | 96.80        |
| NoC (z=7)           | <u>54.70</u> | <u>80.68</u> | <u>87.94</u> | <u>75.50</u> | <u>94.30</u> | <u>97.40</u> |
| NoC (z=8)           | <b>56.60</b> | <b>81.92</b> | <b>88.76</b> | <b>78.30</b> | <b>95.40</b> | <b>97.40</b> |

(b) Self-retrieval results from models trained on COYO10M

| Models              | MSCOCO       |              |              | Flickr30k    |              |              |
|---------------------|--------------|--------------|--------------|--------------|--------------|--------------|
|                     | R@1          | R@5          | R@10         | R@1          | R@5          | R@10         |
| GT Caption          | 34.57        | 59.30        | 69.91        | 63.08        | 86.50        | 92.00        |
| Vanilla             | 36.20        | 60.84        | 71.44        | 60.90        | 83.20        | 89.20        |
| Vanilla (Filtering) | 52.10        | 77.34        | 86.10        | 77.20        | 95.20        | 97.70        |
| NoC (z=1)           | 0.02         | 0.12         | 0.28         | 0.00         | 0.40         | 0.80         |
| NoC (z=2)           | 0.04         | 0.34         | 0.58         | 0.10         | 0.90         | 1.50         |
| NoC (z=3)           | 0.94         | 3.56         | 5.66         | 2.70         | 9.10         | 13.50        |
| NoC (z=4)           | 17.02        | 37.60        | 49.36        | 34.40        | 64.10        | 75.10        |
| NoC (z=5)           | 42.00        | 69.54        | 79.56        | 68.70        | 91.40        | 95.70        |
| NoC (z=6)           | 57.24        | 82.06        | 89.24        | 82.60        | 96.30        | 98.20        |
| NoC (z=7)           | <u>65.32</u> | <u>87.68</u> | <u>92.84</u> | <u>85.40</u> | <u>97.40</u> | <u>98.50</u> |
| NoC (z=8)           | <b>69.66</b> | <b>89.28</b> | <b>94.12</b> | <b>88.20</b> | <b>98.00</b> | <b>99.30</b> |

(d) Self-retrieval results from models trained on COYO125M

Table 12: Self-retrieval performance on MSCOCO and Flickr30k when scaling up the training dataset sizes using COYO. Models of each dataset are trained for the same number of steps. Numbers in **bold** and underlined indicate the best and second-best ones, respectively.

| Models                                            | MSCOCO       |              |              |              | nocaps       |              |              |              |              |              |               |              |
|---------------------------------------------------|--------------|--------------|--------------|--------------|--------------|--------------|--------------|--------------|--------------|--------------|---------------|--------------|
|                                                   | B@4          | M            | C            | CS           | overall      |              | in-domain    |              | near-domain  |              | out-of-domain |              |
|                                                   |              |              |              |              | C            | CS           | C            | CS           | C            | CS           | C             | CS           |
| <b>Alignment Level Computation using ViT-L/14</b> |              |              |              |              |              |              |              |              |              |              |               |              |
| NoC (z=1)                                         | 3.59         | 10.36        | 18.33        | 50.68        | 13.46        | 48.28        | 13.69        | 48.97        | 12.90        | 48.41        | 15.08         | 47.84        |
| NoC (z=2)                                         | 1.53         | 6.80         | 6.45         | 41.06        | 4.38         | 38.85        | 4.95         | 36.54        | 4.42         | 39.68        | 3.81          | 36.54        |
| NoC (z=3)                                         | 1.99         | 8.13         | 11.42        | 47.31        | 8.86         | 45.80        | 10.36        | 46.92        | 8.72         | 46.18        | 8.26          | 44.76        |
| NoC (z=4)                                         | 5.36         | 11.78        | 27.88        | 57.27        | 24.06        | 55.41        | 23.72        | 53.38        | 23.65        | 55.31        | 25.61         | 55.91        |
| NoC (z=5)                                         | 9.19         | 15.01        | 42.27        | 62.89        | 38.59        | 61.07        | 35.13        | 59.54        | 35.57        | 60.37        | 50.73         | 62.86        |
| NoC (z=6)                                         | 11.79        | 17.18        | <u>49.28</u> | 65.58        | 44.00        | 63.33        | 39.53        | 62.06        | 41.25        | 62.84        | 56.00         | 64.61        |
| NoC (z=7)                                         | 12.11        | 18.34        | 49.18        | <b>66.65</b> | 45.09        | <b>64.40</b> | 39.25        | <b>63.02</b> | 42.41        | <b>64.18</b> | 57.87         | <b>65.21</b> |
| NoC (z=8)                                         | <u>12.23</u> | <u>18.43</u> | 48.81        | <u>66.31</u> | 46.21        | <u>64.10</u> | 40.23        | <u>62.84</u> | <u>43.50</u> | <u>63.77</u> | 59.15         | 64.11        |
| <b>Alignment Level Computation using ViT-B/32</b> |              |              |              |              |              |              |              |              |              |              |               |              |
| NoC (z=1)                                         | 9.42         | 13.79        | 33.68        | 54.00        | 29.52        | 50.99        | 33.43        | 51.32        | 28.52        | 50.82        | 29.98         | 51.23        |
| NoC (z=2)                                         | 1.83         | 7.26         | 7.68         | 43.43        | 5.63         | 41.52        | 6.37         | 43.09        | 5.36         | 42.00        | 5.98          | 40.16        |
| NoC (z=3)                                         | 2.31         | 8.73         | 13.24        | 49.10        | 10.54        | 47.36        | 12.15        | 48.49        | 10.09        | 47.62        | 10.88         | 46.51        |
| NoC (z=4)                                         | 6.01         | 12.56        | 30.81        | 59.03        | 25.34        | 56.72        | 25.06        | 56.10        | 23.90        | 56.44        | 30.19         | 57.41        |
| NoC (z=5)                                         | 9.34         | 15.29        | 43.10        | 63.38        | 39.19        | 61.33        | 34.74        | 59.24        | 36.22        | 60.70        | 51.89         | 63.14        |
| NoC (z=6)                                         | 11.70        | 17.18        | 49.01        | 65.23        | 45.29        | 63.22        | <u>41.19</u> | 61.09        | 42.29        | 62.86        | 57.81         | 64.53        |
| NoC (z=7)                                         | <b>12.32</b> | <b>18.67</b> | <b>49.68</b> | 66.26        | <b>47.19</b> | 63.86        | <b>42.07</b> | 62.14        | <b>44.23</b> | 63.51        | <b>60.31</b>  | <u>65.01</u> |
| NoC (z=8)                                         | 11.31        | 16.51        | 47.77        | 63.67        | 43.71        | 61.43        | 39.70        | 60.45        | 41.11        | 60.87        | 54.91         | 62.79        |

Table 13: Zero-shot caption generation performances on MSCOCO and nocaps trained on CC3M when replacing the pre-trained CLIP ViT-L/14 with CLIP ViT-B/32 for alignment level computation. We observe our model seems robust to the pre-trained model. Numbers in **bold** and underlined indicate the best and second-best ones for each model, respectively.

| Models                                            | MSCOCO       |              |              | Flickr30k    |              |              |
|---------------------------------------------------|--------------|--------------|--------------|--------------|--------------|--------------|
|                                                   | R@1          | R@5          | R@10         | R@1          | R@5          | R@10         |
| <b>Alignment Level Computation using ViT-L/14</b> |              |              |              |              |              |              |
| NoC (z=1)                                         | 5.12         | 14.90        | 21.68        | 14.30        | 33.70        | 43.60        |
| NoC (z=2)                                         | 1.08         | 3.22         | 4.98         | 2.90         | 9.30         | 14.40        |
| NoC (z=3)                                         | 2.80         | 8.10         | 12.12        | 7.50         | 21.90        | 29.90        |
| NoC (z=4)                                         | 11.72        | 28.84        | 39.04        | 27.40        | 57.00        | 66.20        |
| NoC (z=5)                                         | 25.24        | 52.10        | 63.78        | 45.80        | 79.20        | 89.30        |
| NoC (z=6)                                         | 38.18        | 65.60        | 76.72        | 62.60        | 91.00        | 95.70        |
| NoC (z=7)                                         | <b>44.16</b> | <b>71.18</b> | <b>81.16</b> | <b>69.20</b> | <b>93.90</b> | <u>97.20</u> |
| NoC (z=8)                                         | <u>43.02</u> | <u>70.74</u> | <u>80.34</u> | <u>67.90</u> | <u>92.90</u> | <b>97.30</b> |
| <b>Alignment Level Computation using ViT-B/32</b> |              |              |              |              |              |              |
| NoC (z=1)                                         | 9.26         | 23.08        | 31.12        | 20.40        | 45.80        | 56.70        |
| NoC (z=2)                                         | 1.38         | 5.06         | 7.82         | 4.60         | 14.10        | 19.40        |
| NoC (z=3)                                         | 3.92         | 11.66        | 17.70        | 11.50        | 29.00        | 39.90        |
| NoC (z=4)                                         | 16.22        | 36.72        | 47.88        | 33.00        | 64.40        | 74.50        |
| NoC (z=5)                                         | 28.66        | 55.76        | 66.82        | 49.70        | 82.30        | 90.40        |
| NoC (z=6)                                         | <u>36.40</u> | <u>64.76</u> | <u>75.92</u> | <u>60.10</u> | <u>91.00</u> | <u>96.00</u> |
| NoC (z=7)                                         | <b>43.20</b> | <b>70.38</b> | <b>80.50</b> | <b>67.30</b> | <b>91.20</b> | <b>96.30</b> |
| NoC (z=8)                                         | 29.50        | 56.42        | 68.64        | 56.50        | 84.50        | 91.10        |

Table 14: Self-retrieval performance on MSCOCO and Flickr30k trained on CC3M when replacing the pre-trained CLIP ViT-L/14 with CLIP ViT-B/32 for alignment level computation. Numbers in **bold** and underlined indicate the best and second-best ones for each model, respectively.

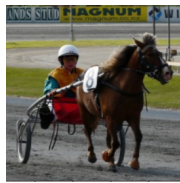

Vanilla Person in action in the race  
 Vanilla (Filtering) A horse being ridden by a driver  
 Ours A horse and **jockey** ride around the track during a race

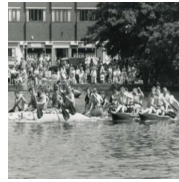

Vanilla The boat is a popular attraction for visitors to the city  
 Vanilla (Filtering) The team of canoeing down river  
 Ours A group of men and women **paddle a canoe** through the water during the **regatta**

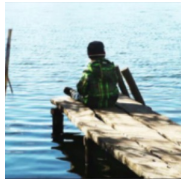

Vanilla Little boy sitting on a pier  
 Vanilla (Filtering) Little boy sitting on a wooden dock  
 Ours Little boy sitting on a wooden pier near the **lake** and **looking at the water**

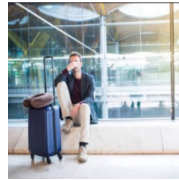

Vanilla Tired traveler sitting on the airport  
 Vanilla (Filtering) Businessman waiting for departure at the airport  
 Ours **Sad and depressed** businessman sitting on the airport **with a suitcase**

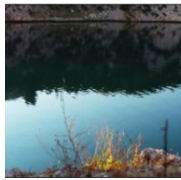

Vanilla Lake in the spring at sunset  
 Vanilla (Filtering) Lake with a mountain range in the background  
 Ours A **beautiful lake** with a **reflection of the sky** and a **rock** in the water

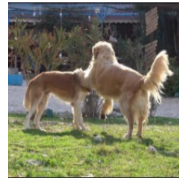

Vanilla Dogs playing in the park  
 Vanilla (Filtering) Dogs playing in the grass  
 Ours Dogs **wrestling** on a **green** grass

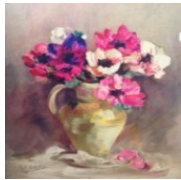

Vanilla Original fine art by person  
 Vanilla (Filtering) Flowers in a vase by painting artist  
 Ours A **still life painting** of a bunch of **red and yellow flowers** in a vase

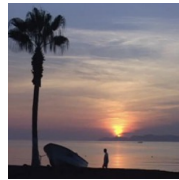

Vanilla Silhouette of a man walking on the beach at sunset  
 Vanilla (Filtering) Silhouette of a man walking on a pier at sunset  
 Ours A man walks **along** the beach at sunset with a **sailboat** in the background

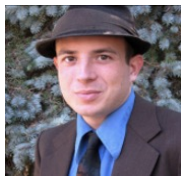

Vanilla Person in a hat and suit  
 Vanilla (Filtering) A man in a suit with a bow tie  
 Ours A man in a **brown fedora** and a **blue** shirt with a bow tie

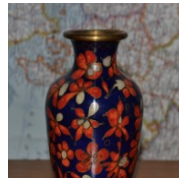

Vanilla A base with a painting of a vase  
 Vanilla (Filtering) Vase with a flower on the table  
 Ours A **vintage** vase with a **beautiful floral pattern**

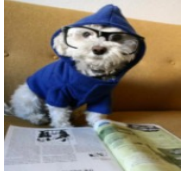

Vanilla This is what my dog looks like  
 Vanilla (Filtering) A dog with glasses reading a book  
 Ours A dog **dressed as a nerd** reads a book

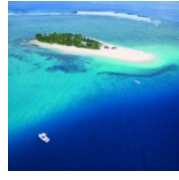

Vanilla Aerial view of the island  
 Vanilla (Filtering) Aerial view of a tropical island  
 Ours Aerial view of a tropical island with **blue water** and **white sand beaches**

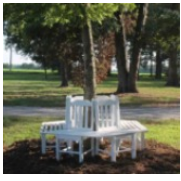

Vanilla A bench in the shade of a tree  
 Vanilla (Filtering) A view of the back of the barn  
 Ours A **white** bench sits in a field of **tall grass** with a **large** tree in the background

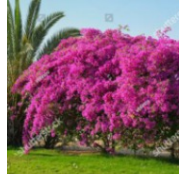

Vanilla Pink flowers on a tree  
 Vanilla (Filtering) Pink flowers on a tree  
 Ours **Beautiful purple orchids** blooming in a park with **green trees** and **blue sky** background

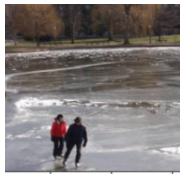

Vanilla Ice skating on the frozen lake  
 Vanilla (Filtering) Ice skating on the frozen lake  
 Ours Ice skating on frozen lake in the **park** on a **sunny winter day**

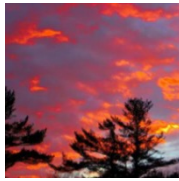

Vanilla Sunset - admire the beauty of creations  
 Vanilla (Filtering) Sunset over the trees in the forest  
 Ours a **red and orange** sunset over a forest of **pine trees**

Figure 13: Examples of generated captions sampled from MSCOCO and CC3M validation splits. The captions of our model are generated with the control signal  $z = 7$ . Expressions capturing fine details from images in ours are highlighted in red.



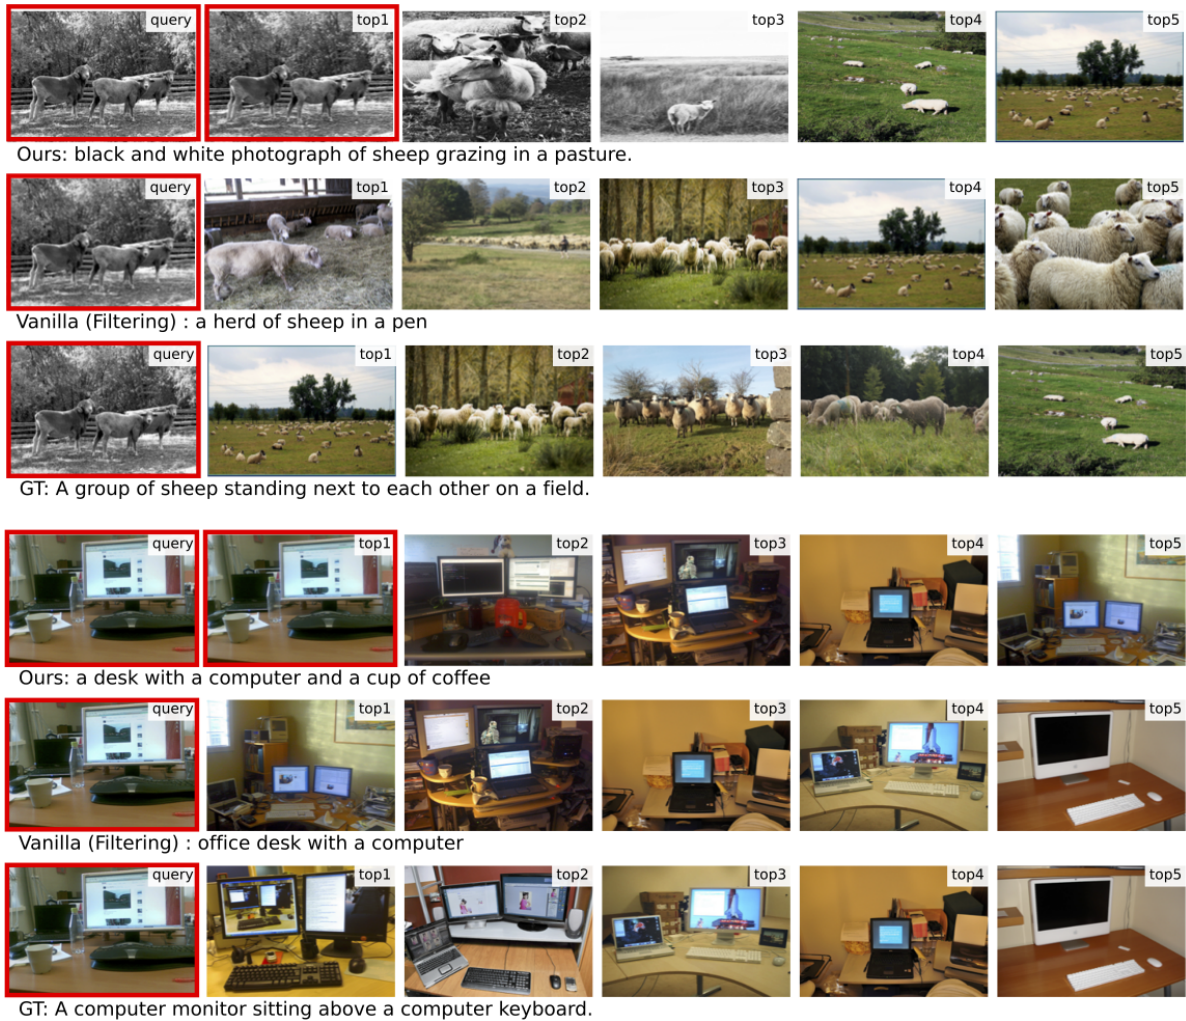

Figure 14: Examples of self-retrieval in MSCOCO. For each example (of three rows), the first column indicates the input image and the generated captions by the specified model, while 2-6th columns show the top-5 retrieved images using the generated captions—by our method and Vanilla (Filtering) baseline—or ground-truth caption.
